# Supplementary material for: Fasting substrates predict chronic kidney disease progression in CREDENCE trial patients with type 2 diabetes
Source: JCI Insight. 2024 Dec 20;9(24):e180637. doi: 10.1172/jci.insight.180637 (PMC11665565; doi:10.1172/jci.insight.180637)

## Supplemental material

**Supplemental Table 1. Multivariate association of Year 1**

**Substrates with Outcomes. §**

|                      | <b>Primary Comp.</b>    | <b>Comp. Renal</b>      | <b>HF/CV death</b>      | <b>All deaths</b>       |
|----------------------|-------------------------|-------------------------|-------------------------|-------------------------|
| <b>Glucose</b>       | 0.77 [0.53–1.12]        | <b>0.62 [0.61–0.97]</b> | 1.12 [0.72–1.76]        | 1.27 [0.76–2.13]        |
| <b>FFA</b>           | <b>0.62 [0.44–0.89]</b> | 0.71 [0.47–1.08]        | <b>0.43 [0.29–0.66]</b> | <b>0.53 [0.33–0.87]</b> |
| <b>Glycerol</b>      | 0.95 [0.74–1.21]        | 0.93 [0.70–1.23]        | 1.27 [0.94–1.70]        | 0.99 [0.71–1.38]        |
| <b>β-OH</b>          | <b>1.22 [1.02–1.46]</b> | 1.13 [0.92–1.39]        | <b>1.37 [1.10–1.71]</b> | <b>1.38 [1.07–1.78]</b> |
| <b>AcAc</b>          | <b>0.72 [0.58–0.88]</b> | <b>0.72 [0.56–0.92]</b> | <b>0.74 [0.58–0.95]</b> | 0.80 [0.59–1.07]        |
| <b>Lactate</b>       | <b>0.40 [0.30–0.55]</b> | <b>0.35 [0.24–0.50]</b> | 0.71 [0.49–1.04]        | <b>0.60 [0.39–0.93]</b> |
| <b>Treatment</b>     | <b>0.58 [0.44–0.77]</b> | <b>0.45 [0.32–0.62]</b> | 0.82 [0.59–1.13]        | 1.04 [0.71–1.52]        |
| <b>Glucose-adj.</b>  | <b>0.70 [0.49–1.00]</b> | <b>0.60 [0.40–0.91]</b> | 0.97 [0.62–1.52]        | 1.16 [0.68–1.99]        |
| <b>FFA-adj.</b>      | 0.78 [0.54–1.14]        | 0.91 [0.58–1.41]        | <b>0.58 [0.37–0.92]</b> | 0.75 [0.44–1.28]        |
| <b>Glycerol-adj.</b> | 0.87 [0.65–1.17]        | 0.82 [0.58–1.15]        | 1.00 [0.70–1.43]        | 0.86 [0.58–1.29]        |
| <b>β-OH-adj.</b>     | <b>1.23 [1.04–1.46]</b> | <b>1.22 [1.00–1.48]</b> | <b>1.28 [1.02–1.62]</b> | 1.22 [0.95–1.58]        |
| <b>AcAc-adj.</b>     | <b>0.75 [0.61–0.92]</b> | <b>0.74 [0.58–0.94]</b> | <b>0.75 [0.58–0.98]</b> | 0.86 [0.63–1.18]        |
| <b>Lactate-adj.</b>  | <b>0.45 [0.32–0.64]</b> | <b>0.39 [0.26–0.59]</b> | <b>0.66 [0.44–0.99]</b> | <b>0.60 [0.38–0.97]</b> |

§ Entries are hazard ratios (HR) and [95% confidence intervals] (per 1 log unit of the predictor); significant HRs are in bold. CV, cardiovascular; HF, heart failure; FFA, plasma free fatty acids; β-OH, plasma β-hydroxybutyrate; AcAc, plasma acetoacetate.

-adj = adjusted for sex; age; body mass index; smoking; estimated glomerular filtration rate; HbA<sub>1c</sub>; systolic blood pressure; prior CV disease, HF at baseline; urinary albumin-to-creatinine ratio; high-density lipoprotein cholesterol; low-density lipoprotein cholesterol; triglycerides; and use of statins, anti-thrombotics, loop and/or non-loop diuretics, β-blockers, metformin, sulphonylureas, insulin, and GLP-1 Ra's in addition to all 6 (log-transformed) substrates.

Supplemental Figure 1

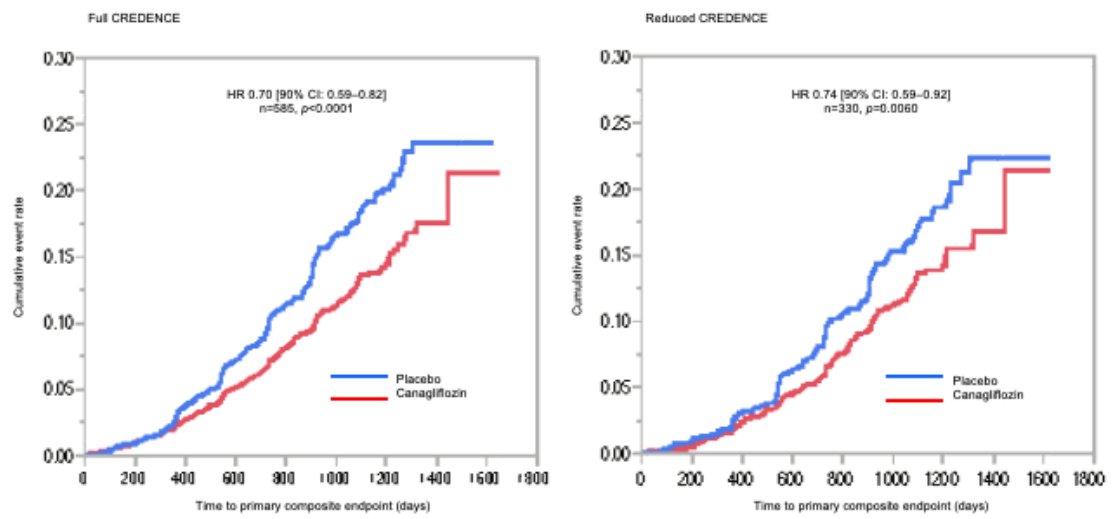

Supplement: Supplemental data [file jciinsight-9-180637-s058.pdf]
